# Supplementary material for: Microscopic evaluation of aqueous two-phase system emulsion characteristics enables rapid determination of critical polymer concentrations for solution micropatterning
Source: Royal Society of Chemistry journal article supplement (doi:10.1039/c7an00255f), 2017-01-01
Supplement: c7an00255f1.pdf [file c7an00255f1.pdf]

## Electronic Supplementary Information

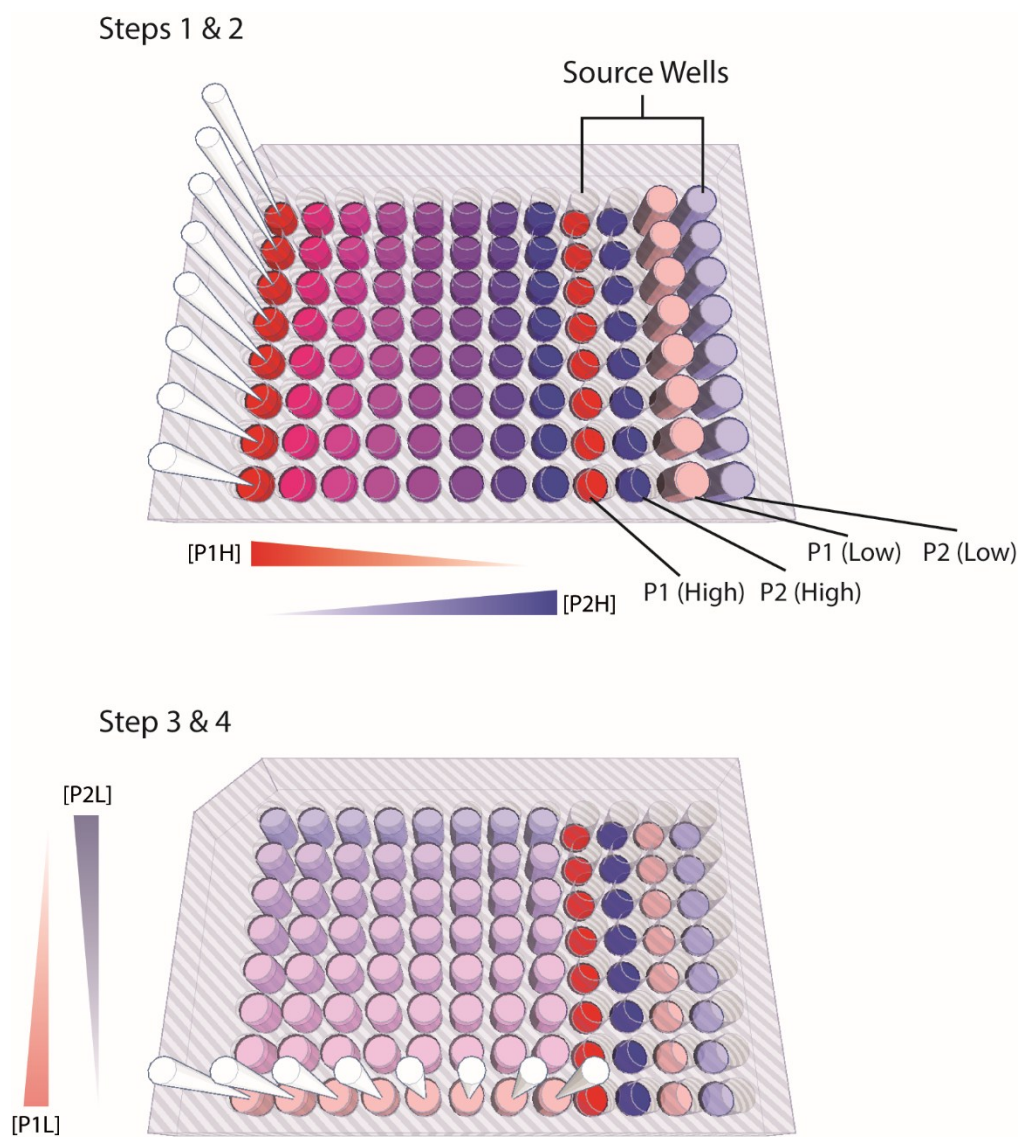

**Fig. S1.** Schematic for generating 64 starting points for precise determination of phase diagrams.

P1= Polymer 1. P2= Polymer 2. H= High concentration. L= Low concentration.

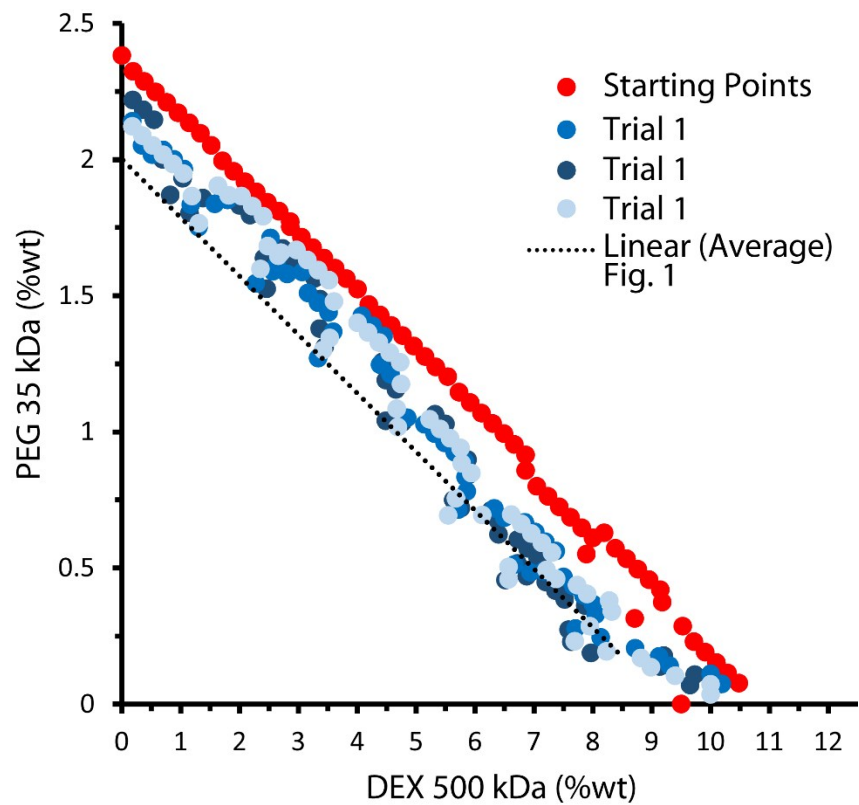

**Fig. S2.** Data for three independent trials for the precise method for phase diagram determination for the PEG 35 kDa-DEX 500 kDa ATPS.

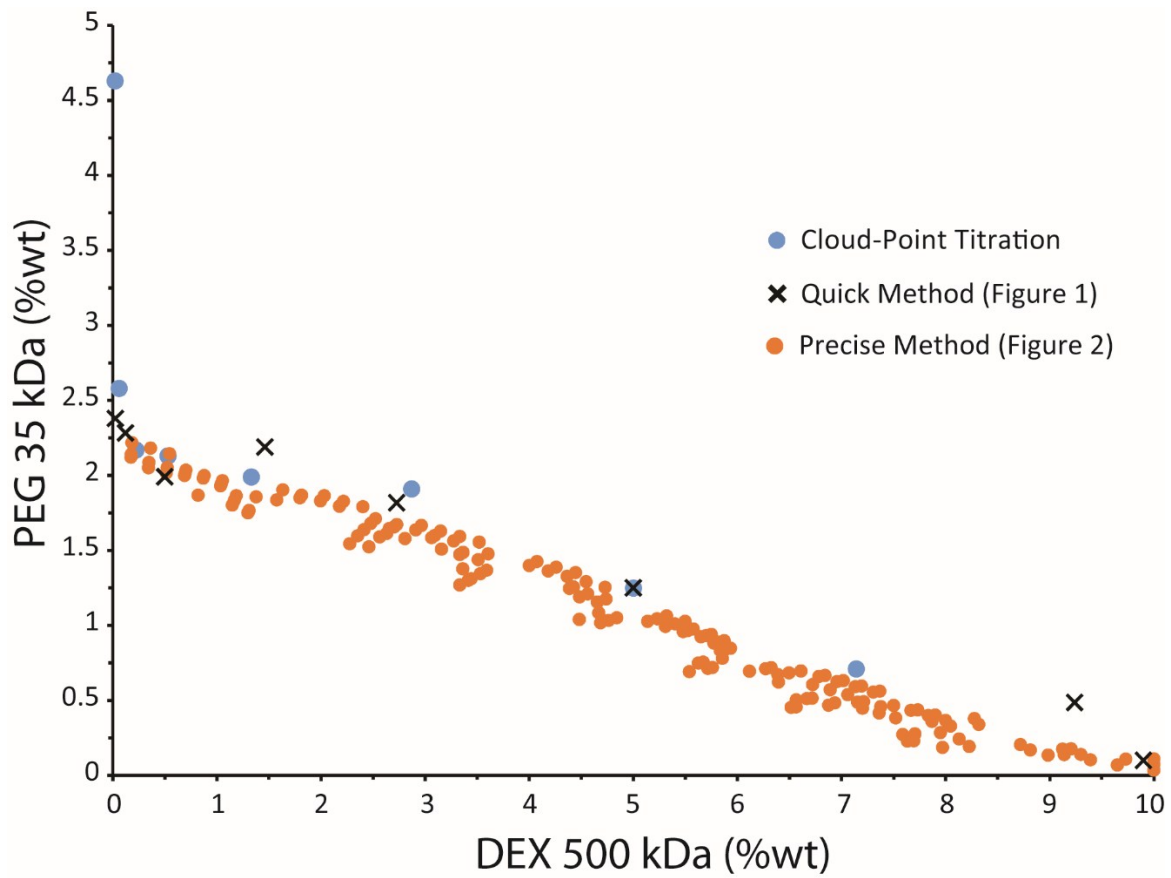

**Fig. S3.** Comparison of phase diagrams determined by macroscopic turbidimetric analysis, microplate estimation assay and precision microplate assay.
